# Supplementary material for: Glucose tolerance is associated with differential expression of microRNAs in skeletal muscle: results from studies of twins with and without type 2 diabetes
Source: Springer Nature journal article supplement (doi:10.1007/s00125-014-3434-2), 2014-11-19
Supplement: MOESM2 [file 8092666]

ESM Fig. 1

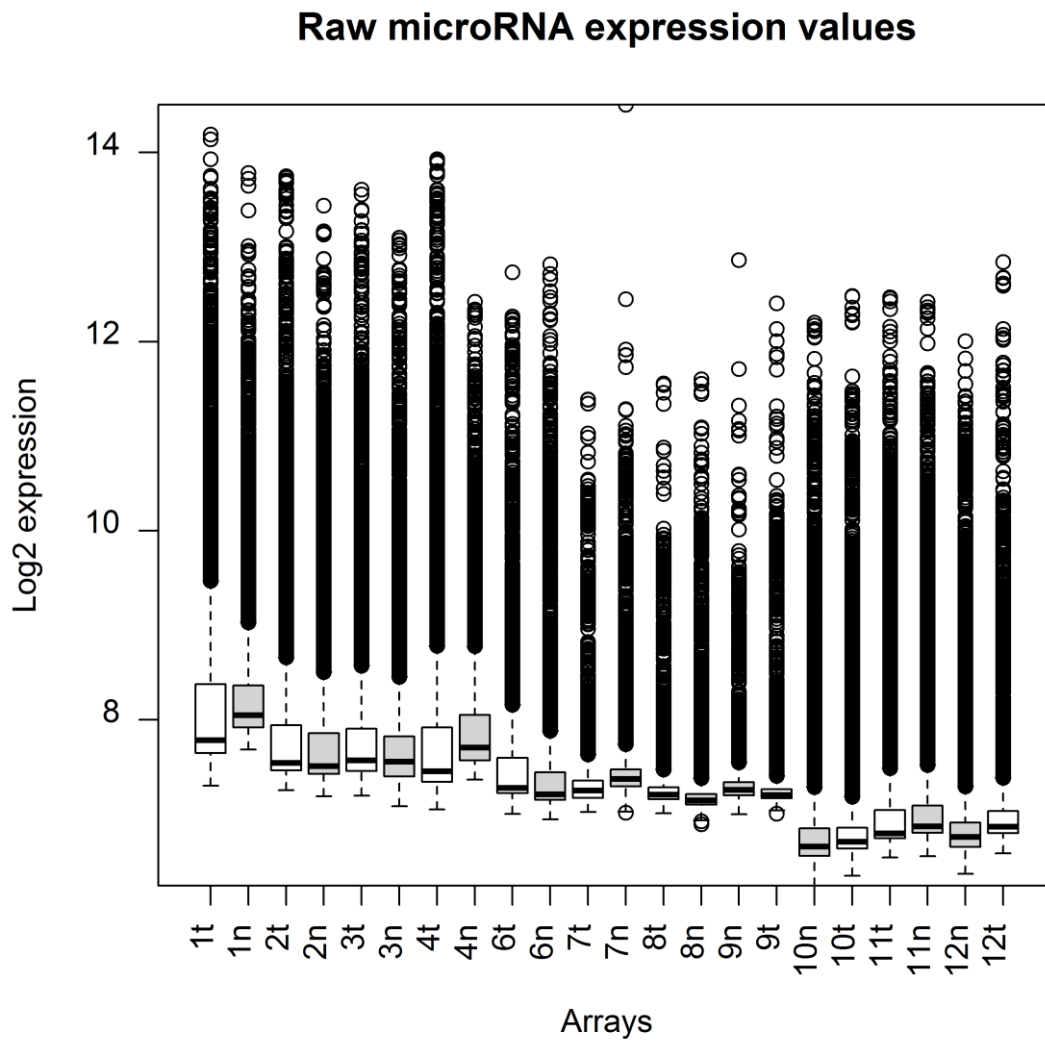

Boxplot of all raw intensities measured with the miRCURY expression arrays for each of the 22 individuals shows that the diabetic twins (white boxes) do not generally have higher or lower expression compared with the non-diabetic twins (gray boxes). t, twin with type 2 diabetes; n, non-diabetic co-twin.
