# Supplementary material for: Glucose tolerance is associated with differential expression of microRNAs in skeletal muscle: results from studies of twins with and without type 2 diabetes
Source: Springer Nature journal article supplement (doi:10.1007/s00125-014-3434-2), 2014-11-19
Supplement: MOESM3 [file 8092666]

**ESM Fig. 2**

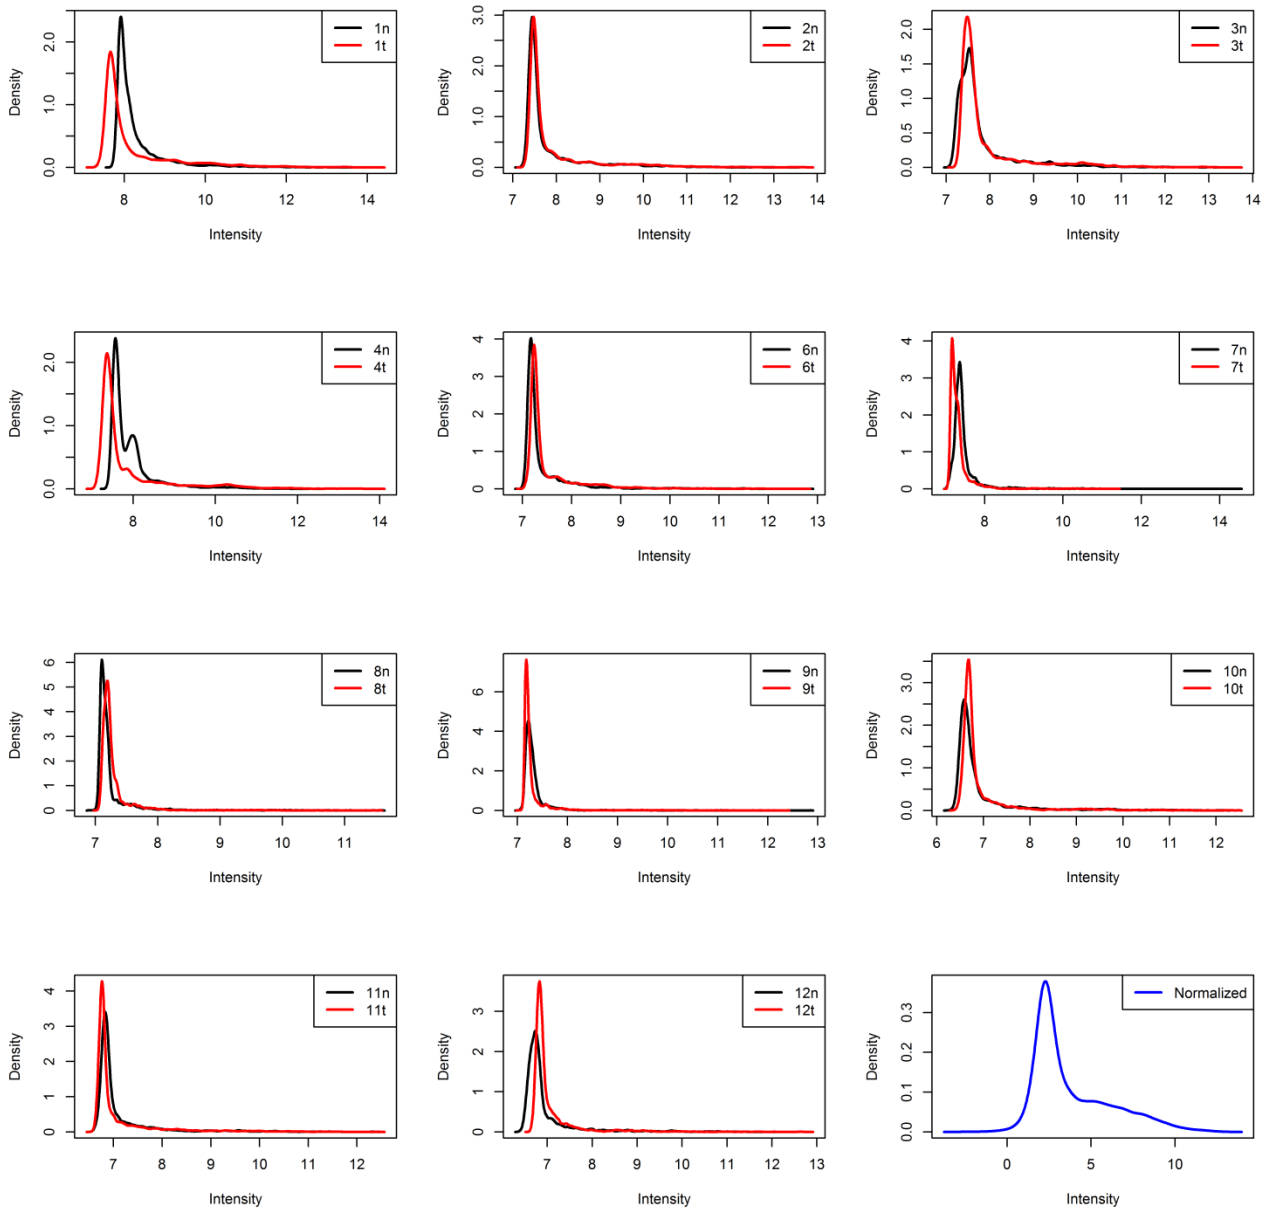

Density plots of all intensities measured with the miRCURY expression arrays after log<sub>2</sub> transformation for each of the 11 twin pairs. t, twin with type 2 diabetes (red); n, non-diabetic co-twin (black). The bottom right plot shows the density of the expression values after background subtraction, quantile normalization and log<sub>2</sub> transformation (blue).
