# Supplementary material for: Glucose tolerance is associated with differential expression of microRNAs in skeletal muscle: results from studies of twins with and without type 2 diabetes
Source: Springer Nature journal article supplement (doi:10.1007/s00125-014-3434-2), 2014-11-19
Supplement: MOESM4 [file 8092666]

ESM Fig. 3

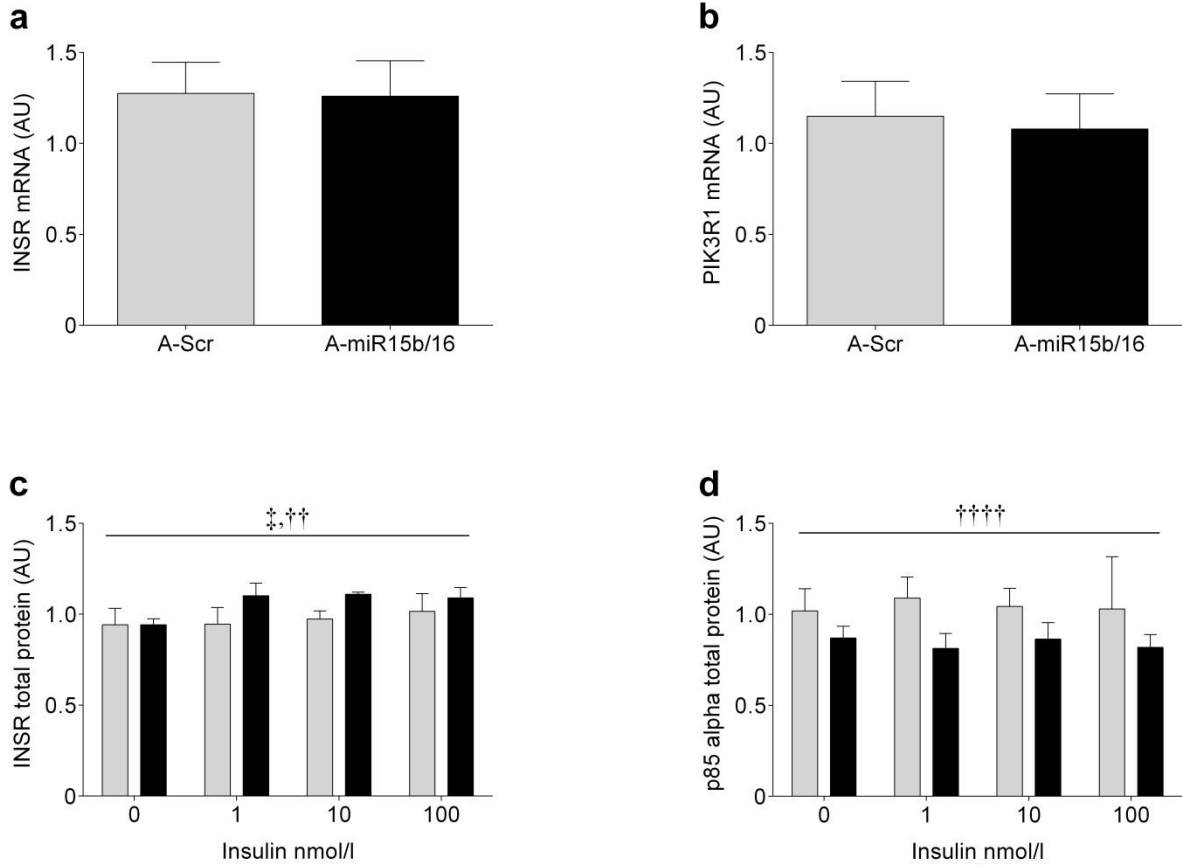

Effect of miR-15b and miR-16 inhibition on insulin signaling molecules. 48 hours of miR15b/miR16 inhibition using LNA antagonomirs in myocytes from 5 healthy individuals. The myocytes were stimulated with 0, 1, 10 or 100 nmol/l insulin for 5-10 minutes before harvesting. The effect of miR15b/miR16 inhibition on **A.** *INSR* mRNA, **B.** *PIK3R1* mRNA **C.** *INSR* protein and **D.** *PIK3R1* (p85 $\alpha$ ) protein levels. Data were analyzed using two-way repeated-measures ANOVAs. Data are means  $\pm$  SD. AU, arbitrary expression unit; A-Scr (gray), scrambled control antagonomir; A-miR15b/16 (black), combination of antagonomirs against miR-15b and miR-16; †† $p=0.01$ , †††† $p=0.0002$  for effect of miR-15b/miR16 inhibition; ‡ $p=0.06$  for insulin effect.
