# Supplementary material for: Glucose tolerance is associated with differential expression of microRNAs in skeletal muscle: results from studies of twins with and without type 2 diabetes
Source: Springer Nature journal article supplement (doi:10.1007/s00125-014-3434-2), 2014-11-19
Supplement: MOESM5 [file 8092666]

ESM Fig. 4

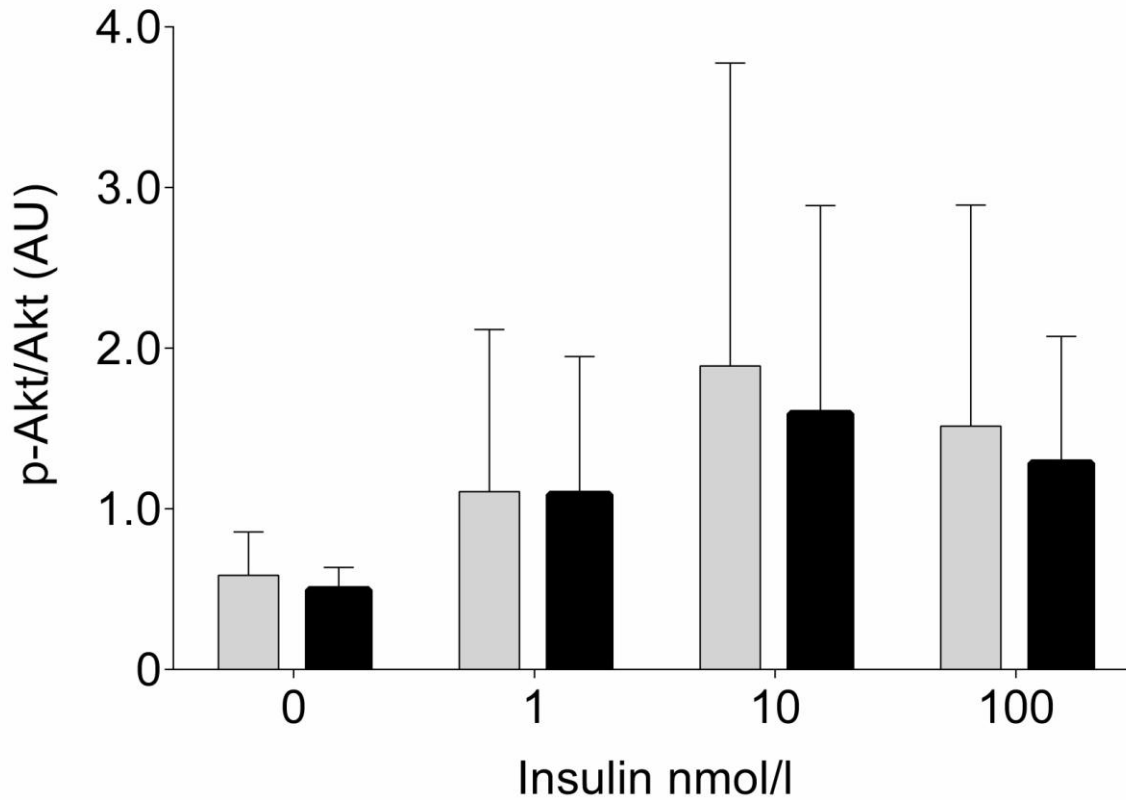

Effect of miR-15b and miR-16 inhibition on p-Akt/Akt phosphorylation measured using western blot. 48 hours of miR15b/miR16 inhibition using LNA antagomirs in myocytes from 5 healthy individuals. The myocytes were stimulated with 0, 1, 10 or 100 nmol/l insulin for 5-10 minutes before harvesting. Data are means  $\pm$  SD. AU, arbitrary expression unit; A-Src (gray), scrambled control antagomir; A-miR15b/16 (black), combination of antagomirs against miR-15b and miR-16. No significant effects were found using a two-way repeated-measures.
