# Supplementary material for: Glucose tolerance is associated with differential expression of microRNAs in skeletal muscle: results from studies of twins with and without type 2 diabetes
Source: Springer Nature journal article supplement (doi:10.1007/s00125-014-3434-2), 2014-11-19
Supplement: MOESM6 [file 8092666]

**ESM Table 1**

Pathway analysis of the predicted targets of the miRNAs differentially expressed in skeletal muscle from the monozygotic twins discordant for type 2 diabetes.

| <b>Family</b> | <b>miRNA</b>        | <b>Chr</b>                                | <b>Pathways</b>                                  |
|---------------|---------------------|-------------------------------------------|--------------------------------------------------|
| miR-15        | hsa-miR-15a         | 13                                        | hsa04910:Insulin signaling pathway               |
|               | <b>hsa-miR-15b</b>  | 3                                         | hsa04722:Neurotrophin signaling pathway          |
|               | <b>hsa-miR-16-1</b> | 13                                        | hsa05200:Pathways in cancer                      |
|               | <b>hsa-miR-16-2</b> | 3                                         | hsa04310:Wnt signaling pathway                   |
|               | hsa-miR-195         | 17                                        | hsa05215:Prostate cancer                         |
|               |                     |                                           | hsa04110:Cell cycle                              |
|               |                     |                                           | hsa04510:Focal adhesion                          |
|               |                     |                                           | hsa04150:mTOR signaling pathway                  |
|               |                     |                                           | hsa05220:Chronic myeloid leukemia                |
|               |                     |                                           | hsa05223:Non-small cell lung cancer              |
|               |                     |                                           | hsa05221:Acute myeloid leukemia                  |
|               |                     |                                           | hsa05218:Melanoma                                |
|               |                     |                                           | hsa04914:Progesterone-mediated oocyte maturation |
|               |                     |                                           | hsa05214:Glioma                                  |
|               |                     |                                           | hsa04520:Adherens junction                       |
|               |                     | hsa04340:Hedgehog signaling pathway       |                                                  |
|               |                     | hsa04115:p53 signaling pathway            |                                                  |
|               |                     | hsa04810:Regulation of actin cytoskeleton |                                                  |
|               |                     | hsa05211:Renal cell carcinoma             |                                                  |
|               |                     | hsa04114:Oocyte meiosis                   |                                                  |
|               |                     | hsa05212:Pancreatic cancer                |                                                  |
|               |                     | hsa04350:TGF-beta signaling pathway       |                                                  |
| miR-17        | <b>hsa-miR-17</b>   | 13                                        | hsa04144:Endocytosis                             |
|               | hsa-miR-18a         | 13                                        | hsa05220:Chronic myeloid leukemia                |
|               | hsa-miR-18b         | X                                         | hsa04360:Axon guidance                           |
|               | <b>hsa-miR-20a</b>  | 13                                        | hsa05219:Bladder cancer                          |
|               | <b>hsa-miR-20b</b>  | X                                         | hsa05200:Pathways in cancer                      |
|               | <b>hsa-miR-93</b>   | 7                                         | hsa04350:TGF-beta signaling pathway              |
|               | <b>hsa-miR-106a</b> | X                                         | hsa05212:Pancreatic cancer                       |
|               | <b>hsa-miR-106b</b> | 7                                         | hsa05214:Glioma                                  |
|               |                     |                                           | hsa04010:MAPK signaling pathway                  |
|               |                     |                                           | hsa04722:Neurotrophin signaling pathway          |
|               |                     |                                           | hsa05215:Prostate cancer                         |
|               |                     |                                           | hsa05211:Renal cell carcinoma                    |
|               |                     |                                           | hsa05218:Melanoma                                |
|               |                     | hsa04150:mTOR signaling pathway           |                                                  |
|               |                     | hsa05223:Non-small cell lung cancer       |                                                  |
|               |                     | hsa05210:Colorectal cancer                |                                                  |

|         |                                                                                                                                                                                                                     |  |                                                                                                                                                                                                                                                                                                                 |
|---------|---------------------------------------------------------------------------------------------------------------------------------------------------------------------------------------------------------------------|--|-----------------------------------------------------------------------------------------------------------------------------------------------------------------------------------------------------------------------------------------------------------------------------------------------------------------|
|         |                                                                                                                                                                                                                     |  | hsa05221:Acute myeloid leukemia<br>hsa05222:Small cell lung cancer<br>hsa04012:ErbB signaling pathway<br>hsa04510:Focal adhesion                                                                                                                                                                                |
| miR-451 | <b>hsa-miR-451</b> 17<br>hsa-miR-451b 17                                                                                                                                                                            |  | none                                                                                                                                                                                                                                                                                                            |
| miR-103 | <b>hsa-miR-103a-1</b> 5<br><b>hsa-miR-103a-2</b> 20<br>hsa-miR-103b-1 5<br>hsa-miR-103b-2 20<br><b>hsa-miR-107</b> 10                                                                                               |  | hsa04340:Hedgehog signaling pathway                                                                                                                                                                                                                                                                             |
| miR-425 | <b>hsa-miR-425</b> 3                                                                                                                                                                                                |  | none                                                                                                                                                                                                                                                                                                            |
| miR-10  | <b>hsa-miR-10b</b> 2                                                                                                                                                                                                |  | hsa04310:Wnt signaling pathway                                                                                                                                                                                                                                                                                  |
| miR-25  | <b>hsa-miR-25</b> 7<br><b>hsa-miR-92a-1</b> 13<br><b>hsa-miR-92a-2</b> X<br>hsa-miR-92b 1                                                                                                                           |  | none                                                                                                                                                                                                                                                                                                            |
| miR-363 | <b>hsa-miR-363</b> X                                                                                                                                                                                                |  | none                                                                                                                                                                                                                                                                                                            |
| miR-191 | <b>has-miR-191</b> 3                                                                                                                                                                                                |  | none                                                                                                                                                                                                                                                                                                            |
| no info | <b>hsa-miR-30e*</b> 1                                                                                                                                                                                               |  | no info on targets                                                                                                                                                                                                                                                                                              |
| let-7   | hsa-let-7a-1 9<br>hsa-let-7a-2 11<br>hsa-let-7a-3 22<br>hsa-let-7b 22<br>hsa-let-7c 21<br>hsa-let-7d 9<br>hsa-let-7e 19<br>hsa-let-7f-1 9<br>hsa-let-7f-2 X<br>hsa-let-7g 3<br><b>hsa-let-7i</b> 12<br>hsa-miR-98 X |  | hsa04010:MAPK signaling pathway<br>hsa05220:Chronic myeloid leukemia<br>hsa05200:Pathways in cancer<br>hsa05218:Melanoma<br>hsa05214:Glioma<br>hsa04115:p53 signaling pathway<br>hsa05210:Colorectal cancer<br>hsa05212:Pancreatic cancer<br>hsa05219:Bladder cancer<br>hsa04722:Neurotrophin signaling pathway |
| miR-223 | <b>hsa-miR-223</b> X                                                                                                                                                                                                |  | none                                                                                                                                                                                                                                                                                                            |

Family, miRNA family relationships according to miRBase ver. 17 ([www.miRBase.org](http://www.miRBase.org)); miRNA, the miRNA of each family with miRNAs that are significantly differentially expressed in the diabetic MZ twins compared to their non-diabetic co-twins shown in bold; Chr, chromosomal location; Pathways, the results of a pathway analysis performed on the targets of the given miRNA family predicted with Targetscan version 4.2. All pathways remaining statistically significantly ( $\alpha < 0.1$ ) after correction for multiple comparisons using Benjamini-Hochberg's false discovery rate are shown. Pathway predictions were made with the DAVID Functional Annotation Tool using the KEGG pathway analysis (21;38).
