# Supplementary material for: Glucose tolerance is associated with differential expression of microRNAs in skeletal muscle: results from studies of twins with and without type 2 diabetes
Source: Springer Nature journal article supplement (doi:10.1007/s00125-014-3434-2), 2014-11-19
Supplement: MOESM7 [file 8092666]

**ESM Table 2**

© 2000-2014 QIAGEN. All rights reserved.

| Symbol              | Synonym(s)                                                                                                                                                                                                                                                                                                                                                                                                                                                                                                                                                                                                                                                                                                                    | Entrez Gene Name                                              | Gene symbol -- human (Hugo / HGNC, Entrez Gene) | Location        | Family                          | Drugs                                                                                                                                                              | Entrez Gene ID for | Entrez Gene ID for | Entrez Gene ID for |
|---------------------|-------------------------------------------------------------------------------------------------------------------------------------------------------------------------------------------------------------------------------------------------------------------------------------------------------------------------------------------------------------------------------------------------------------------------------------------------------------------------------------------------------------------------------------------------------------------------------------------------------------------------------------------------------------------------------------------------------------------------------|---------------------------------------------------------------|-------------------------------------------------|-----------------|---------------------------------|--------------------------------------------------------------------------------------------------------------------------------------------------------------------|--------------------|--------------------|--------------------|
| 4E-BP1              | 4E-BP1, 4EBP, AA959816, BP-1, Eukaryotic translation initiation factor 4e binding protein 1, PHAS-I                                                                                                                                                                                                                                                                                                                                                                                                                                                                                                                                                                                                                           | eukaryotic translation initiation factor 4E binding protein 1 |                                                 | Cytoplasm       | translation regulator           |                                                                                                                                                                    | 1978               | 13685              | 116636             |
| ACLY                | A730098H14RIK, ACL, ATP CITRATE LYASE, ATPCL, AW538652, CITRATE LYASE, CLATP, RP23-392I3.9                                                                                                                                                                                                                                                                                                                                                                                                                                                                                                                                                                                                                                    | ATP citrate lyase                                             |                                                 | Cytoplasm       | enzyme                          |                                                                                                                                                                    | 47                 | 104112             | 24159              |
| AFX                 | AFX, AFX1, Afxh, forkhead box O4, MLLT7, RGD1561201, RP23-356J7.2                                                                                                                                                                                                                                                                                                                                                                                                                                                                                                                                                                                                                                                             | forkhead box O4                                               |                                                 | Nucleus         | transcription regulator         |                                                                                                                                                                    | 4303               | 54601              | 302415             |
| AKT                 | AKT1/2/3, B/Akt, Pkb, RAC-PK                                                                                                                                                                                                                                                                                                                                                                                                                                                                                                                                                                                                                                                                                                  |                                                               |                                                 | Cytoplasm       | group                           | afuresertib                                                                                                                                                        |                    |                    |                    |
| AMP                 | 149022-20-8, 5'-adenylic acid, 5'-AMP, 61-19-8, adenosine monophosphate, C10H14N5O7P, [(2R,3S,4R,5R)-5-(6-aminopurin-9-yl)-3,4-dihydroxyoxolan-2-yl]methyl dihydrogen phosphate                                                                                                                                                                                                                                                                                                                                                                                                                                                                                                                                               |                                                               |                                                 | Other           | chemical - endogenous mammalian |                                                                                                                                                                    |                    |                    |                    |
| Apoptosis           |                                                                                                                                                                                                                                                                                                                                                                                                                                                                                                                                                                                                                                                                                                                               |                                                               |                                                 | Other           | function                        |                                                                                                                                                                    |                    |                    |                    |
| ATP                 | 56-65-5, 9-beta-D-arabinofuranosyladenine 5'-triphosphate, 9-β-D-arabinofuranosyladenine 5'-triphosphate, adenosine 5'-(tetrahydrogen triphosphate), adenosine 5'-triphosphate, adenosine triphosphate, ATP, ATP4-, C10H16N5O13P3, [(2R,3S,4R,5R)-5-(6-aminopurin-9-yl)-3,4-dihydroxyoxolan-2-yl]methoxyhydroxyphosphoryl] phosphono hydrogen phosphate                                                                                                                                                                                                                                                                                                                                                                       |                                                               |                                                 | Other           | chemical - endogenous mammalian |                                                                                                                                                                    |                    |                    |                    |
| BAD                 | A1325008, BBC2, BCL2-associated agonist of cell death, BCL2L8                                                                                                                                                                                                                                                                                                                                                                                                                                                                                                                                                                                                                                                                 | BCL2-associated agonist of cell death                         |                                                 | Cytoplasm       | other                           |                                                                                                                                                                    | 572                | 12015              | 64639              |
| c-RAF               | 6430402F14Rik, AA990557, BB129353, CMD1NN, Craf1, CRAF, D830050J10Rik, MURINE leukaemia VIRAL ONCOGENE HOMOLOG1, MURINE LEUKEMIA VIRAL ONCOGENE HOMOLOG1, NS5, Raf, Raf-1 proto-oncogene, serine/threonine kinase, v-Raf, v-raf-leukaemia viral oncogene 1, v-raf-leukemia viral oncogene 1                                                                                                                                                                                                                                                                                                                                                                                                                                   | Raf-1 proto-oncogene, serine/threonine kinase                 | RAF1                                            | Cytoplasm       | kinase                          | CHIR-265, vemurafenib, dabrafenib, regorafenib, bortezomib/sorafenib, dexamethasone/enalidomide/sorafenib, bevacizumab/sorafenib, dabrafenib/trametinib, sorafenib | 5894               | 110157             | 24703              |
| C3G                 | 4932418O06Rik, C3G, C3G-1, C3G-2, GRF2, Rap guanine nucleotide exchange factor (GEF) 1, RP11-40A7.1, RP23-304D11.1                                                                                                                                                                                                                                                                                                                                                                                                                                                                                                                                                                                                            | Rap guanine nucleotide exchange factor (GEF) 1                |                                                 | Cytoplasm       | other                           |                                                                                                                                                                    | 2889               | 107746             | 63881              |
| cAMP                | (4aR,6R,7R,7aS)-6-(6-aminopurin-9-yl)-2-hydroxy-2-oxo-4a,6,7,7a-tetrahydro-4H-furo[3,2-d][1,3,2]dioxaphosphinin-7-ol, 11002-78-1, 3',5'-cyclic AMP, 3',5'-monophosphate, adenosine cyclic, 33116-15-3, 37839-81-9, 54532-48-8, 55576-98-2, 60-92-4, 66067-13-8, 68407-13-6, adenosine 3',5'-phosphate, adenosine cyclic 3',5'-monophosphate, adenosine cyclic 3,5 monophosphate, adenosine cyclic monophosphate, adenosine, cyclic 3',5'-(hydrogen phosphate), C10H12N5O6P, cAMP, cyclic adenosine monophosphate, cyclic adenylic acid, cyclic AMP, disodium salt, cyclic AMP, monoammonium salt, cyclic AMP, monopotassium salt, cyclic AMP, monosodium salt, cyclic AMP, sodium salt, cyclic-3',5'-monophosphate, adenosine |                                                               |                                                 | Other           | chemical - endogenous mammalian |                                                                                                                                                                    |                    |                    |                    |
| CBL                 | 4732447J05Rik, C-CBL, Casitas B-lineage lymphoma, Cbl proto-oncogene, E3 ubiquitin protein ligase, Cbl ubiquitin ligase, CBL2, CBLA, FRA11B, LOC283153, NSLL, p120 Cbl, RGD1561386, RNF55                                                                                                                                                                                                                                                                                                                                                                                                                                                                                                                                     | Cbl proto-oncogene, E3 ubiquitin protein ligase               |                                                 | Nucleus         | transcription regulator         |                                                                                                                                                                    | 867                | 12402              | 500985             |
| Cell growth         |                                                                                                                                                                                                                                                                                                                                                                                                                                                                                                                                                                                                                                                                                                                               |                                                               |                                                 | Other           | function                        |                                                                                                                                                                    |                    |                    |                    |
| CIP4                | A1646975, CIP4, Cip4/2, HSTP, STOT, STP, thyroid hormone receptor interactor 10                                                                                                                                                                                                                                                                                                                                                                                                                                                                                                                                                                                                                                               | thyroid hormone receptor interactor 10                        | TRIP10                                          | Cytoplasm       | other                           |                                                                                                                                                                    | 9322               | 106628             | 116717             |
| CRK                 | CRK, Crkl/II and CrkL                                                                                                                                                                                                                                                                                                                                                                                                                                                                                                                                                                                                                                                                                                         |                                                               |                                                 | Cytoplasm       | group                           |                                                                                                                                                                    |                    |                    |                    |
| eIF2B               | eIF2beta, eIF2β                                                                                                                                                                                                                                                                                                                                                                                                                                                                                                                                                                                                                                                                                                               |                                                               |                                                 | Cytoplasm       | complex                         |                                                                                                                                                                    |                    |                    |                    |
| eIF4E               | AUTS19, BOS 6469, CAP-binding, CBP, EG668879, EIF4E1, Eif4eps, EIF4EL1, EIF4F, eukaryotic translation initiation factor 4E, If4e                                                                                                                                                                                                                                                                                                                                                                                                                                                                                                                                                                                              | eukaryotic translation initiation factor 4E                   | EIF4E                                           | Cytoplasm       | translation regulator           |                                                                                                                                                                    | 1977               | 13684              | 117045             |
| ENAC                |                                                                                                                                                                                                                                                                                                                                                                                                                                                                                                                                                                                                                                                                                                                               |                                                               |                                                 | Plasma Membrane | complex                         |                                                                                                                                                                    |                    |                    |                    |
| ERstress            |                                                                                                                                                                                                                                                                                                                                                                                                                                                                                                                                                                                                                                                                                                                               |                                                               |                                                 | Other           | function                        |                                                                                                                                                                    |                    |                    |                    |
| ERK1/2              | p42/44 mapk, P42/p44 erk, p42/p44 MAP KINASE, P42/p44 mapk, p44/p42 MAPK                                                                                                                                                                                                                                                                                                                                                                                                                                                                                                                                                                                                                                                      |                                                               |                                                 | Cytoplasm       | group                           |                                                                                                                                                                    |                    |                    |                    |
| Fatty acidsynthesis |                                                                                                                                                                                                                                                                                                                                                                                                                                                                                                                                                                                                                                                                                                                               |                                                               |                                                 | Other           | function                        |                                                                                                                                                                    |                    |                    |                    |
| FKHR                | FOXO1/3A                                                                                                                                                                                                                                                                                                                                                                                                                                                                                                                                                                                                                                                                                                                      |                                                               |                                                 | Cytoplasm       | group                           |                                                                                                                                                                    |                    |                    |                    |

|           |                                                                                                                                                                                                                                                                                                                                                            |                                                                     |       |                     |                         |                                                                                                                                                                                                                                                                             |      |       |        |
|-----------|------------------------------------------------------------------------------------------------------------------------------------------------------------------------------------------------------------------------------------------------------------------------------------------------------------------------------------------------------------|---------------------------------------------------------------------|-------|---------------------|-------------------------|-----------------------------------------------------------------------------------------------------------------------------------------------------------------------------------------------------------------------------------------------------------------------------|------|-------|--------|
| FKHRL1    | 1110048B16RIK, 2010203A17RIK, AF6q21, C76856, Fkhr2, FKHRL1, FKHRL1P2, forkhead box O3, FOXO2, FOXO3A                                                                                                                                                                                                                                                      | forkhead box O3                                                     |       | Nucleus             | transcription regulator |                                                                                                                                                                                                                                                                             | 2309 | 56484 | 294515 |
| FYN       | A1448320, AW552119, C-FYN, Fyn proto-oncogene, FYN proto-oncogene, Src family tyrosine kinase, FYNT, p59 Fyn B, p59-FYN, RP1-66H14.1, SLK, SRC-LIKE KINASE, SYN                                                                                                                                                                                            | FYN proto-oncogene, Src family tyrosine kinase                      |       | Plasma Membrane     | kinase                  | dasatinib                                                                                                                                                                                                                                                                   | 2534 | 14360 | 25150  |
| GAB1      | AA408973, AW107238, GAB, GRB2-ASSOCIATED BINDER-1, GRB2-associated binding protein 1, growth factor receptor bound protein 2-associated protein 1                                                                                                                                                                                                          | GRB2-associated binding protein 1                                   |       | Cytoplasm           | other                   |                                                                                                                                                                                                                                                                             | 2549 | 14388 | 361388 |
| Glucose   | (3R,4S,5S,6R)-6-(hydroxymethyl)oxane-2,3,4,5-tetrol, 50-99-7, biliary glucose, C6H12O6, D-glucose, dextrose, glucose, sugar                                                                                                                                                                                                                                |                                                                     |       | Other               | chemical - endogenous   |                                                                                                                                                                                                                                                                             |      |       |        |
| GLUT4     | Gef, GLUT4, solute carrier family 2 (facilitated glucose transporter), member 4                                                                                                                                                                                                                                                                            | solute carrier family 2 (facilitated glucose transporter), member 4 |       | Plasma Membrane     | transporter             |                                                                                                                                                                                                                                                                             | 6517 | 20528 | 25139  |
| GRB10     | 5730571D09Rik, A1325020, GRB-IR, growth factor receptor-bound protein 10, IRBP, MEG1, mKIAA0207, RGD1566234, RP23-119N24.1, RSS                                                                                                                                                                                                                            | growth factor receptor-bound protein 10                             | GRB10 | Cytoplasm           | other                   |                                                                                                                                                                                                                                                                             | 2887 | 14783 | 498416 |
| GRB2      | AA408164, ASH, BOS 19430, EGFRBP-GRB2, GRAB2, growth factor receptor-bound protein 2, MST084, MSTP084, NCKAP2, RP23-28I4.1                                                                                                                                                                                                                                 | growth factor receptor-bound protein 2                              |       | Cytoplasm           | other                   |                                                                                                                                                                                                                                                                             | 2885 | 14784 | 81504  |
| GSK3      | Glycogen synthase kinase, Gsk, Gsk3 alpha/beta, GSK3 α/β                                                                                                                                                                                                                                                                                                   |                                                                     |       | Cytoplasm           | group                   |                                                                                                                                                                                                                                                                             |      |       |        |
| GYS       | 2.4.1.11, glycogen (starch) synthetase, glycogen(starch) synthase, Gys, UDP-glucose-glycogen glucosyltransferase, UDP-glycogen synthase, UDPG-glycogen synthetase, UDPG-glycogen transglucosylase, UDPglucose:glycogen 4-alpha-D-glucosyltransferase, UDPglucose:glycogen 4-α-D-glucosyltransferase, uridine diphosphoglucose-glycogen glucosyltransferase |                                                                     |       | Cytoplasm           | group                   |                                                                                                                                                                                                                                                                             |      |       |        |
| INSR      | 4932439J01Rik, alpha subunit INSULIN receptor, CD220, D630014A15RIK, HHF5, insulin receptor, INSULIN receptor B, Insulin receptor beta, INSULIN receptor KINASE, Insulin receptor β, INSULIN RPTK, IR, IR alpha, IR α, IR-B, IRK, α subunit INSULIN receptor                                                                                               | insulin receptor                                                    | INSR  | Plasma Membrane     | kinase                  | insulin detemir, INS, canakinumab/INS, insulin aspart/insulin detemir, ceritinib, insulin glargine/insulin lispro, insulin aspart, insulin glulisine, insulin lispro, insulin glargine, protamine zinc insulin                                                              | 3643 | 16337 | 24954  |
| INSULIN   | Ins                                                                                                                                                                                                                                                                                                                                                        |                                                                     |       | Extracellular Space | group                   |                                                                                                                                                                                                                                                                             |      |       |        |
| IRS       | INSULIN receptor SUBSTRATE                                                                                                                                                                                                                                                                                                                                 |                                                                     |       | Cytoplasm           | group                   |                                                                                                                                                                                                                                                                             |      |       |        |
| IRS1      | ENSMUSG0000022591, G972R, HIRS-1, insulin receptor substrate 1, IRS1IRM                                                                                                                                                                                                                                                                                    | insulin receptor substrate 1                                        | IRS1  | Cytoplasm           | enzyme                  |                                                                                                                                                                                                                                                                             | 3667 | 16367 | 25467  |
| JAK1/2    |                                                                                                                                                                                                                                                                                                                                                            |                                                                     |       | Cytoplasm           | group                   |                                                                                                                                                                                                                                                                             |      |       |        |
| JNK1      | A1849689, C-JUN N-TERMINAL KINASE1, JNK, JNK-46, JNK1, JNK1A2, JNK21B1/2, mitogen-activated protein kinase 8, p46JNK1, p46JNK1 alpha, p46JNK1 α, PRKM8, Sapk gamma, SAPK P46, Sapk γ, SAPK1, SAPK1c, STRESS-ACTIVATED protein KINASE-LIKE KINASE                                                                                                           | mitogen-activated protein kinase                                    |       | Cytoplasm           | kinase                  | aplidine                                                                                                                                                                                                                                                                    | 5599 | 26419 | 116554 |
| LAR       | AA591035, LAR, Lar ptp2b, LARS, Leukocyte Antigen Related Protein Phosphatase, protein tyrosine phosphatase, receptor type, F, RP23-94L18.2, RP5-1029K14.1, RPTP-LAR                                                                                                                                                                                       | protein tyrosine phosphatase, receptor type, F                      |       | Plasma Membrane     | phosphatase             |                                                                                                                                                                                                                                                                             | 5792 | 19268 | 360406 |
| LIPE      | 4933403G17RIK, Cholesteryl Ester Hydrolase, Hormone-sensitive Lipase, HSL, LHS, lipase, hormone-sensitive, LOC100503639, LOC100862213, mCG 147818, Neutral ce hydrolase                                                                                                                                                                                    | lipase, hormone-sensitive                                           | LIPE  | Cytoplasm           | enzyme                  |                                                                                                                                                                                                                                                                             | 3991 | 16890 | 25330  |
| Lipolysis |                                                                                                                                                                                                                                                                                                                                                            |                                                                     |       | Other               | function                |                                                                                                                                                                                                                                                                             |      |       |        |
| MEK1/2    | MEK1/2, MKK1/2                                                                                                                                                                                                                                                                                                                                             |                                                                     |       | Cytoplasm           | group                   |                                                                                                                                                                                                                                                                             |      |       |        |
| mTOR      | 2610315D21Rik, A1327068, Flat, FRAP, FRAP1, FRAP2, FRB, mechanistic target of rapamycin (serine/threonine kinase), RAFT1, RAP1T, RP23-423L9.1, RRAFT1                                                                                                                                                                                                      | mechanistic target of rapamycin (serine/threonine kinase)           |       | Nucleus             | kinase                  | ridaforolimus, OSI-027, methotrexate/sirolimus/tacrolimus, dactolisib, everolimus/exemestane, lenalidomide/temsirolimus, imatinib/sirolimus, cyclophosphamide/sirolimus, cyclosporine A/sirolimus/tacrolimus, sirolimus, temsirolimus, tacrolimus, everolimus, pimecrolimus | 2475 | 56717 | 56718  |

|                                   |                                                                                                                                                                                                                                                                                 |                                                               |                        |                                 |                                                                                                                                      |        |        |        |
|-----------------------------------|---------------------------------------------------------------------------------------------------------------------------------------------------------------------------------------------------------------------------------------------------------------------------------|---------------------------------------------------------------|------------------------|---------------------------------|--------------------------------------------------------------------------------------------------------------------------------------|--------|--------|--------|
| NCK                               | 6330586M15Rik, D230010O13RIK, NCK, NCK adaptor protein 1, Nck $\alpha$ , NCK $\alpha$ , non-catalytic region of tyrosine kinase adaptor protein 1, p47Nck                                                                                                                       | NCK adaptor protein 1                                         | Cytoplasm              | kinase                          |                                                                                                                                      | 4690   | 17973  | 300955 |
| p70 S6K<br>PDE3B                  | p70, p70 S6 Kinase, S6K<br>3',5'-Cyclic phosphodiesterase B, 9830102A01RIK, AI847709, cAMP-Dependent 3',5'-Cyclic Phosphodiesterase, cGIPDE1, Cgmp-inhibited 3',5'-cyclic phosphodiesterase b, HcGIP1, PDE3, Phosphodiesterase 3b, phosphodiesterase 3B, cGMP-inhibited         | phosphodiesterase 3B, cGMP-inhibited                          | Cytoplasm<br>Cytoplasm | group<br>enzyme                 | dyphylline, nitroglycerin, medorinone, aminophylline, cilostazol, dipyrindamole, amrinone, tolbutamide, theophylline, pentoxifylline | 5140   | 18576  | 29516  |
| PDK1                              | 3'-PDK, 3-phosphoinositide dependent protein kinase-1, PDK1, PDPK2, PRO0461, RP23-153H18.1                                                                                                                                                                                      | 3-phosphoinositide dependent protein kinase 1                 | Cytoplasm              | kinase                          |                                                                                                                                      | 5170   | 18607  | 81745  |
| PI3K                              | 1-phosphatidylinositol 3-kinase, 2.7.1.137, ATP:1-phosphatidyl-1D-myo-inositol 3-phosphotransferase, Phosphatidylinositol 3 kinase, phosphatidylinositol 3'-kinase, PI3-kinase, PtdIns 3 Kinase, type I phosphatidylinositol kinase, type III phosphoinositide 3-kinase, Vps34p |                                                               | Cytoplasm              | complex                         |                                                                                                                                      |        |        |        |
| PIP2                              | 1,2-diacyl-sn-glycero-3-phospho-(1'-myo-inositol-4',5'-bisphosphate), 1-O-(3-sn-phosphatidyl)-1D-myo-inositol 4,5-bis(dihydrogen phosphate), 1-phosphatidyl-1D-myo-inositol 4,5-bisphosphate, C11H19O19P3R2                                                                     |                                                               | Other                  | chemical - endogenous mammalian |                                                                                                                                      |        |        |        |
| PIP3                              | 1-phosphatidyl-1D-myo-inositol 3,4,5-trisphosphate, phosphatidylinositol-3,4,5-trisphosphate, phosphoinositide (3,4,5) P3, PI(3,4,5)P3, PIns(3,4,5)P3, PIP3, PtdIns(3,4,5)P3                                                                                                    |                                                               | Other                  | chemical - endogenous mammalian |                                                                                                                                      |        |        |        |
| PKA<br>PKC( $\lambda$ , $\zeta$ ) | A-Kinase, cAMP-dependent protein kinase, protein KINASE A<br>Apk, Atypical Protein Kinases C, PKC ( $\lambda$ , $\zeta$ ), PKC ZETA/LAMBDA, PKC $\zeta$ / $\lambda$                                                                                                             |                                                               | Cytoplasm<br>Cytoplasm | complex<br>group                |                                                                                                                                      |        |        |        |
| PP1                               | any Pp1 (protein phosphatase 1 complex), Atp-Mg2+-Dependent Protein Phosphatase, PP1, Pp1 (protein phosphatase 1 complex), PPA1, Protein Phosphatase 1                                                                                                                          |                                                               | Cytoplasm              | complex                         |                                                                                                                                      |        |        |        |
| Proteinsynthesis<br>PTEN          | 10q23del, 2310035O07RIK, A130070J02Rik, AI463227, B430203M17RIK, BZS, CWS1, DEC, GLM2, MHAM, Mmac, MMAC1, MUTATED IN MULTIPLE ADVANCED CANCERS, mutated in multiple advanced cancers 1, phosphatase and tensin homolog, PTEN1, TEP1                                             | phosphatase and tensin homolog                                | Other<br>Cytoplasm     | function<br>phosphatase         |                                                                                                                                      | 5728   | 19211  | 50557  |
| PTP1B                             | protein tyrosine phosphatase, non-receptor type 1, protein-TYROSINE PHOSPHATASE, Ptp, PTP-1B, PTP-HA2, PTP1B $\alpha$ , PTP1B $\alpha$ , PTP1BB, Ptpase 1, PTPASE 1B, RP23-58A8.1                                                                                               | protein tyrosine phosphatase, non-receptor type 1             | Cytoplasm              | phosphatase                     |                                                                                                                                      | 5770   | 19246  | 24697  |
| RAPTOR                            | 4932417H02Rik, KOG1, Mip1, mKIAA1303, Rap, RAPTOR, regulatory associated protein of MTOR, complex 1, RGD1311784, RP24-225K18.1                                                                                                                                                  | regulatory associated protein of MTOR, complex 1              | Cytoplasm              | other                           |                                                                                                                                      | 57521  | 74370  | 287871 |
| RAS<br>SGK                        | RP1-188K17.1, serum/glucocorticoid regulated kinase 1, Serum/Glucocorticoid Regulated Serine/Threonine Protein Kinase, SGK                                                                                                                                                      | serum/glucocorticoid regulated kinase 1                       | Cytoplasm<br>Cytoplasm | group<br>kinase                 | SGK1                                                                                                                                 | 6446   | 20393  | 29517  |
| SHC                               | p52SHC, p66, p66SHC, RP11-307C12.1, SHC, Shc (46 kDa isoform), SHC (Src homology 2 domain containing) transforming protein 1, SHC P66 isoform, SHCA, src homology 2 domain-containing transforming protein C1                                                                   | SHC (Src homology 2 domain containing) transforming protein 1 | Cytoplasm              | kinase                          |                                                                                                                                      | 6464   | 20416  | 85385  |
| SHIP                              | 3.1.3.86, p150Ship, phosphatidylinositol-3,4,5-trisphosphate 5-phosphatase                                                                                                                                                                                                      |                                                               | Cytoplasm              | group                           |                                                                                                                                      |        |        |        |
| SHP2                              | 2700084A17Rik, AW536184, BPTP3, CFC, MGC14433, Noonan syndrome 1, NS1, protein tyrosine phosphatase, non-receptor type 11, PTP-1D, PTP2C, SAP-2, SH-PTP2, SH-PTP3, SHP-2, Src homology protein 2, SYP                                                                           | protein tyrosine phosphatase, non-receptor type 11            | Cytoplasm              | phosphatase                     |                                                                                                                                      | 5781   | 19247  | 25622  |
| SOCS3                             | ATOD4, CIS3, CISH3, EF-10, RP23-268N22.6, Soc3, Sosc3, SSI-3, Suppressor of cytokine signaling 3                                                                                                                                                                                | suppressor of cytokine signaling 3                            | Cytoplasm              | phosphatase                     |                                                                                                                                      | 9021   | 12702  | 89829  |
| Sodiumtransport<br>SOS            |                                                                                                                                                                                                                                                                                 |                                                               | Other<br>Cytoplasm     | function<br>group               |                                                                                                                                      |        |        |        |
| STX4                              | p35-2, STX4A, Syn-4, Syntaxin, syntaxin 4, syntaxin 4A (placental)                                                                                                                                                                                                              | syntaxin 4                                                    | Plasma Membrane        | transporter                     |                                                                                                                                      | 6810   | 20909  | 81803  |
| SYNIP                             | 6030470M02RIK, RP23-101M12.1, Synip, syntaxin binding protein 4, Synthaxin binding protein 4                                                                                                                                                                                    | syntaxin binding protein 4                                    | Cytoplasm              | other                           |                                                                                                                                      | 252983 | 20913  | 303443 |
| TC10                              | ARHQ, HEL-S-42, ras homolog family member Q, ras homolog gene family, member Q, RASL7A, Rhot, TC10, TC10 beta, TC10 $\beta$ , TC10A, Tc10alpha                                                                                                                                  | ras homolog family member Q                                   | Plasma Membrane        | enzyme                          |                                                                                                                                      | 23433  | 104215 | 85428  |
| Transcription                     |                                                                                                                                                                                                                                                                                 |                                                               | Other                  | function                        |                                                                                                                                      |        |        |        |

|           |                                                                                                                                                                                     |                                                         |      |                 |         |                        |      |       |       |
|-----------|-------------------------------------------------------------------------------------------------------------------------------------------------------------------------------------|---------------------------------------------------------|------|-----------------|---------|------------------------|------|-------|-------|
| TSC1      | Hamartin, LAM, RP23-362N19.3, TSC, tuberous sclerosis 1                                                                                                                             | tuberous sclerosis 1                                    | TSC1 | Cytoplasm       | other   |                        | 7248 | 64930 | 60445 |
| Tsc1-Tsc2 | TSC                                                                                                                                                                                 |                                                         |      | Cytoplasm       | complex |                        |      |       |       |
| TSC2      | LAM, Nafid, PPP1R160, Rc, Tcs2, TSC4, TUBERIN, tuberous sclerosis 2                                                                                                                 | tuberous sclerosis 2                                    |      | Cytoplasm       | other   |                        | 7249 | 22084 | 24855 |
| VAMP2     | mVam2, RATVAMPB, RATVAMPIR, RP23-26L6.8, SYB, SYB2, sybII, Synaptobrevin 2, Vamp ii, vesicle-associated membrane protein 2, vesicle-associated membrane protein 2 (synaptobrevin 2) | vesicle-associated membrane protein 2 (synaptobrevin 2) |      | Plasma Membrane | other   | botulinum toxin type B | 6844 | 22318 | 24803 |

Reproduced with permission from QIAGENs Ingenuity Pathway Analysis (IPA, QIAGEN, Redwood City, [www.qiagen.com/ingenuity/Ingenuity](http://www.qiagen.com/ingenuity/Ingenuity))
